# Supplementary material for: A catalytic deracemisation of alcohols
Source: Royal Society of Chemistry journal article supplement (doi:10.1039/b704956k), 2007-01-01

Gareth Adair  
Rxn 647 product

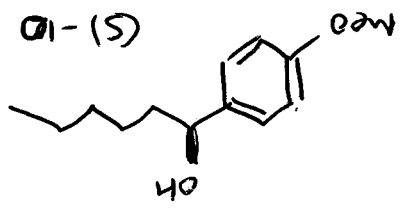

Current Data Parameters  
NAME Sep15-2006  
EXTNO 20  
PROCNO 1

F2 - Acquisition Parameters  
Date\_ 20060915  
Time 15.19  
INSTRUM av300  
PROBHD 5 mm BBO BB-1H  
PULPROG zg30  
TD 32768  
SOLVENT CDCl3  
NS 3  
DS 2  
SWH 6172.839 Hz  
FIDRES 0.188380 Hz  
AQ 2.6542580 sec  
RG 181  
DM 81.000 usec  
DE 6.00 usec  
TE 293.2 K  
D1 1.00000000 sec  
TD0 1

==== CHANNEL f1 =====  
NUC1 1H  
P1 7.00 usec  
PL1 -1.50 dB  
SFO1 300.2218540 MHz

F2 - Processing parameters  
SI 32768  
SF 300.2200323 MHz  
WDW EM  
SSB 0  
LB 0.30 Hz  
GB 0  
PC 1.00

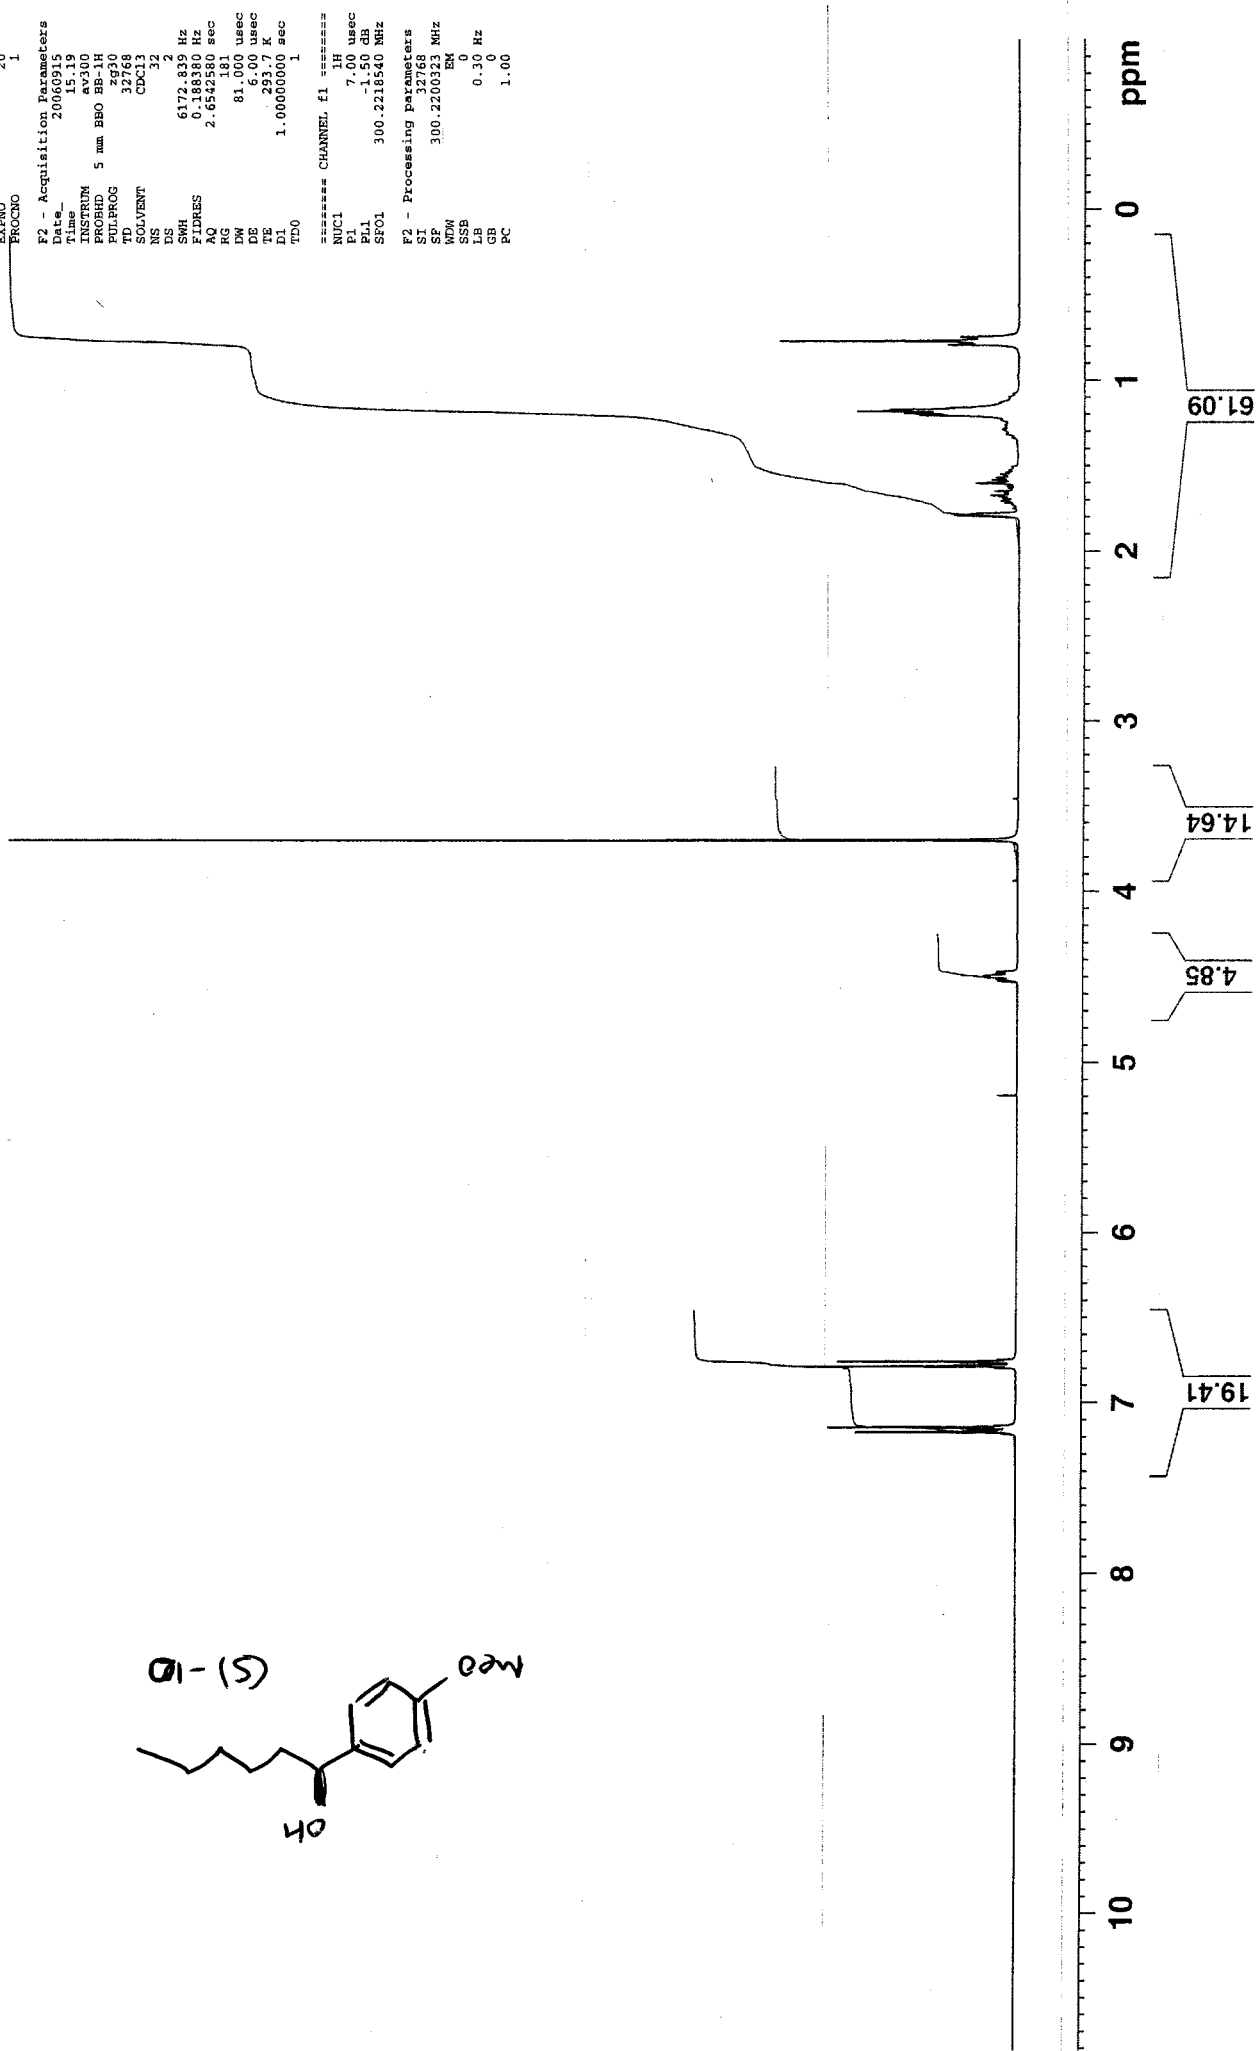

Supplement: b704956k1.pdf [file b704956k1.pdf]
