# Supplementary material for: A catalytic deracemisation of alcohols
Source: Royal Society of Chemistry journal article supplement (doi:10.1039/b704956k), 2007-01-01
Supplement: b704956k3.pdf [file b704956k3.pdf]

EPSRC National Mass Spectrometry Service Centre  
Chemistry Department, University of Wales Swansea,  
SWANSEA SA2 8PP

Tel / Fax: 01792 29 5553 / 29 5554

E-mail: mscentre@swansea.ac.uk

Director: Prof AG Brenton

Enquiries to Manager: Mrs BK Stein

for office use only

|                  |             |
|------------------|-------------|
| Swansea Code     | BAT 15 SLA  |
| Date of Receipt: | 29 SEP 2006 |
| Date completed:  | 11 OCT 2006 |

Please complete this sample request form and return **IN DUPLICATE** for each sample.  
**No very toxic, carcinogenic or hazardous samples may be sent without prior arrangement.**  
**Use adequate packaging of samples to ensure safety and to prevent breakages.**

NAME OF SENDER: G. ADAIR

Tel no. ....

e-Mail address: ch9graa@bath.ac.uk

Dr P A Slatford  
Department of Chemistry  
Bath University  
Claverton Down  
Bath BA2 7AY

**DETAILS OF SAMPLE:**

Name and description of material (structural formula if known)

Sample Reference GA 647  
as on container

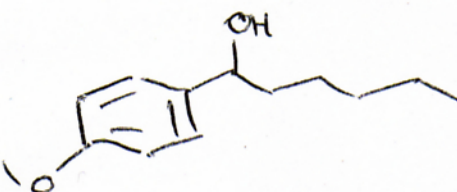

Molecular Formula

C<sub>13</sub>H<sub>20</sub>O<sub>2</sub>

Molecular Weight

208.15

Melting Point

~ 25 °C

Solvent in which it dissolves

DCM

**SERVICE(S) REQUIRED:** Tick relevant box(es):

Low resolution EI/CI MS

☒

Low resolution Fast-atom Bombardment (LSIMS)

☐

Low resolution Electrospray

☐

Low resolution MALDI

☐

Accurate Mass\* Peak Match on (pseudo-) molecular ion

☒

**For GC-MS Samples please use separate GC-MS Form**

**OFFICE USE ONLY**

ANAL DONE

|    | LR                                  | HR                                  |
|----|-------------------------------------|-------------------------------------|
| EI | <input checked="" type="checkbox"/> | <input checked="" type="checkbox"/> |
| CI | <input checked="" type="checkbox"/> | <input checked="" type="checkbox"/> |
| ES | <input type="checkbox"/>            | <input type="checkbox"/>            |
| FB | <input type="checkbox"/>            | <input type="checkbox"/>            |
| M  | <input type="checkbox"/>            | <input type="checkbox"/>            |
| GC | <input type="checkbox"/>            | <input type="checkbox"/>            |

\* If an accurate mass only is requested it is necessary to include a RECENT copy of the FULL low resolution spectrum, CLEARLY SHOWING THE ION IN QUESTION

COSHH hazard assessment: Low? ☒ Medium? ☐ High? ☐ Extreme? ☐

**NO SAMPLES IN THE EXTREME CATEGORY MAY BE SENT WITHOUT PRIOR ARRANGEMENT.**

**Details if High or Extreme hazard** (Tick as applicable): Very Toxic .... Carcinogenic.... Mutagenic.... Explosive... Pyrophoric.... Lachrymator.... Smelly!... Other (detail): .....

**Specific requirements or handling instructions** (With respect to COSHH or for analytical purposes):

Compound decomposes over time in solid or liquid forms and more rapidly in solution. Please freeze on receipt.

March 2005

LY

Low resolution masses  $\pm 0.4$ Da

Accurate mass measurement: EI

Reference compound: Perfluorotributylamine

Calculated mass for molecular ION: 208.1458

Measured mass (of ION): 208.1455
