# Supplementary material for: A catalytic deracemisation of alcohols
Source: Royal Society of Chemistry journal article supplement (doi:10.1039/b704956k), 2007-01-01
Supplement: b704956k6.pdf [file b704956k6.pdf]

Gareth Adair  
Rxn 646 product

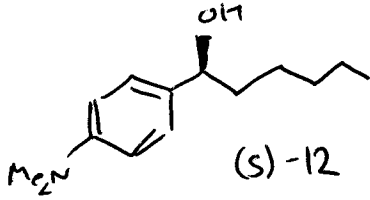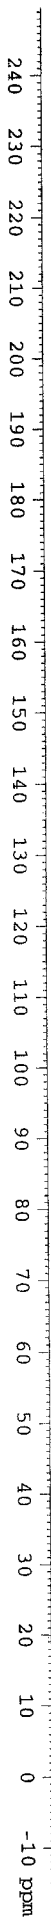

- 150.57
- 133.34
- 127.36
- 127.13
- 113.14
- 112.97
- 77.92
- 77.49
- 77.07
- 74.88
- 41.13
- 39.11
- 32.23
- 26.16
- 23.05
- 14.52

```

Current Data Parameters
NAME      Smp14-2006
EXPNO     11
PROCNO    1

F2 - Acquisition Parameters
Date_     20060914
Time      13.14
INSTRUM   av300
PROBHD    5 mm BBO BB-JH
PULPROG   zgpg30
PCPDPRG2  pe5536
SOLVENT    CDCl3
NS         64
DS         2
SWH        20326.202 Hz
FIDRES     0.310188 Hz
AQ         1.6122355 sec
RG         14596.5
AQ         24.600 usec
DE         2.00 usec
TE         300.2 K
===== CHANNEL f1 =====
NUC1       13C
P1         7.25 usec
P2         14.50 usec
PL1        0.0000000 sec
PL2        0.0000000 sec
SFO1       75.4990304 MHz
===== CHANNEL f2 =====
CPDPRG2   waltz16
NUC2       13C
P2         7.00 usec
P4         14.00 usec
PCPD2     80.00 usec
PL2       -1.50 dB
PL12      22.00 dB
SFO2      300.2212009 MHz
F2 - Processing parameters
SI         65536
SF         75.4903490 MHz
WDW        EM
SSB        0
LB         1.00 Hz
GB         0
PC         1.40
  
```
