# Supplementary material for: A catalytic deracemisation of alcohols
Source: Royal Society of Chemistry journal article supplement (doi:10.1039/b704956k), 2007-01-01
Supplement: b704956k7.pdf [file b704956k7.pdf]

EPSRC National Mass Spectrometry Service Centre  
Chemistry Department, University of Wales Swansea,  
SWANSEA SA2 8PP  
Tel / Fax: 01792 29 5553 / 29 5554  
E-mail: mscentre@swansea.ac.uk  
Director: Prof AG Brenton  
Enquiries to Manager: Mrs BK Stein

for office use only

|                  |              |
|------------------|--------------|
| Swansea Code     | BAT 16 SLA   |
| Date of Receipt: | 29 SEP 2006  |
| Date completed:  | - 9 OCT 2006 |

Please complete this sample request form and return **IN DUPLICATE** for each sample.  
No very toxic, carcinogenic or hazardous samples may be sent without prior arrangement.  
Use adequate packaging of samples to ensure safety and to prevent breakages.

NAME OF SENDER: G. ADAIR

Dr P A Slatford  
Department of Chemistry  
Bath University  
Claverton Down  
Bath BA2 7AY

Tel no. ....

e-Mail address: ch9graa@bath.ac.uk

DETAILS OF SAMPLE:

Name and description of material (structural formula if known)

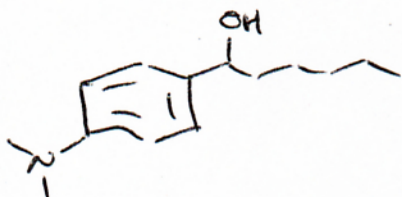

Sample Reference GA 646  
as on container

Molecular Formula

C<sub>14</sub>H<sub>23</sub>NO

Molecular Weight

221.18

Melting Point

Solvent in which it dissolves

DCM

SERVICE(S) REQUIRED: Tick relevant box(es):

Low resolution EI/CI MS

☒

Low resolution Fast-atom Bombardment (LSIMS)

☐

Low resolution Electrospray

☐

Low resolution MALDI

☐

Accurate Mass\* Peak Match on (pseudo-) molecular ion

☒

For GC-MS Samples please use separate GC-MS Form

OFFICE USE ONLY  
ANAL DONE

|    | LR                                  | HR                                  |
|----|-------------------------------------|-------------------------------------|
| EI | <input checked="" type="checkbox"/> | <input type="checkbox"/>            |
| CI | <input checked="" type="checkbox"/> | <input type="checkbox"/>            |
| ES | <input type="checkbox"/>            | <input checked="" type="checkbox"/> |
| FB | <input type="checkbox"/>            | <input type="checkbox"/>            |
| M  | <input type="checkbox"/>            | <input type="checkbox"/>            |
| GC | <input type="checkbox"/>            | <input type="checkbox"/>            |

\* If an accurate mass only is requested it is necessary to include a RECENT copy of the FULL low resolution spectrum, CLEARLY SHOWING THE ION IN QUESTION

COSHH hazard assessment: Low? ☒ Medium? ☐ High? ☐ Extreme? ☐

NO SAMPLES IN THE EXTREME CATEGORY MAY BE SENT WITHOUT PRIOR ARRANGEMENT.

Details if High or Extreme hazard (Tick as applicable): Very Toxic .... Carcinogenic.... Mutagenic.... Explosive... Pyrophoric.... Lachrymator.... Smelly!... Other (detail): .....

Specific requirements or handling instructions (With respect to COSHH or for analytical purposes):

Compound decomposes over time as a solid and more rapidly in solution. Please freeze on receipt.

March 2005

Accurate mass measurement: Electrospray (positive)

Reference compound: Polyethylenimine

Calculated mass: [M+H]<sup>+</sup> [M+NH<sub>4</sub>]<sup>+</sup> [M+Na]<sup>+</sup>  
(of ION) 222.1852

Measured mass (of ION): 222.1851

LY

Low resolution masses ± 0.4Da
