# Supplementary material for: A catalytic deracemisation of alcohols
Source: Royal Society of Chemistry journal article supplement (doi:10.1039/b704956k), 2007-01-01
Supplement: b704956k8.pdf [file b704956k8.pdf]

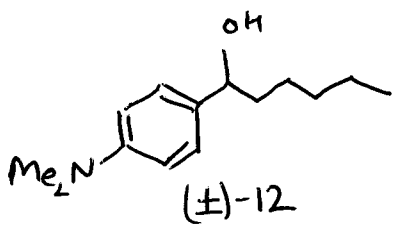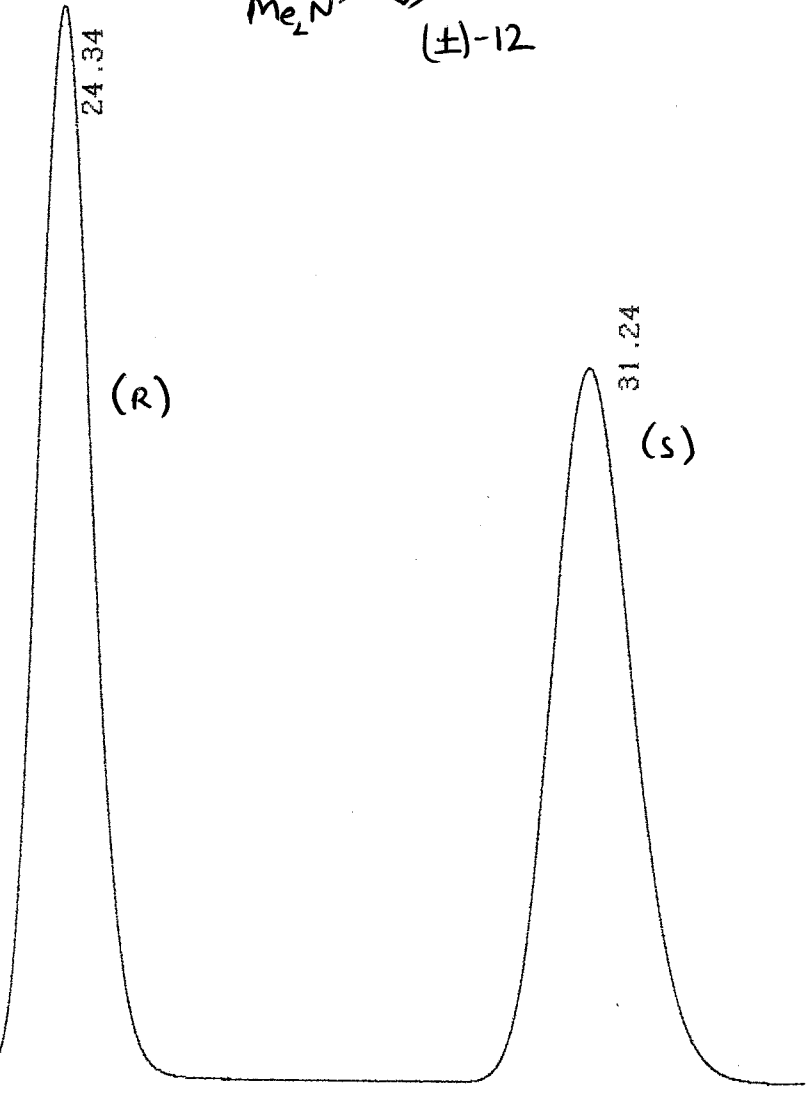

DATA SAVED TO BIN # 123

| FILE 1. | METHOD 0. | RUN 145 | INDEX 5  | CH= "A" | PS= 1. | BIN 123 |
|---------|-----------|---------|----------|---------|--------|---------|
| PEAK#   | AREA%     | RT      | AREA     | BC      |        |         |
| 1       | 0.097     | 5.98    | 78866    | 02      |        |         |
| 2       | 1.229     | 6.55    | 998641   | 03      |        |         |
| 3       | 0.398     | 21.16   | 323024   | 01      |        |         |
| 4       | 49.173    | 24.34   | 39945201 | 01      |        |         |
| 5       | 49.103    | 31.24   | 39888092 | 01      |        |         |
| TOTAL   | 100.      |         | 81233824 |         |        |         |

Chiralcel OB-H column  
5% iPrOH / 95% hexane  
1 mL/min flow

WARNING - MEMORY AT 8. K - UNPROTECTED CHROMATOGRAMS WILL BE REPLACED
