# Supplementary material for: A catalytic deracemisation of alcohols
Source: Royal Society of Chemistry journal article supplement (doi:10.1039/b704956k), 2007-01-01
Supplement: b704956k9.pdf [file b704956k9.pdf]

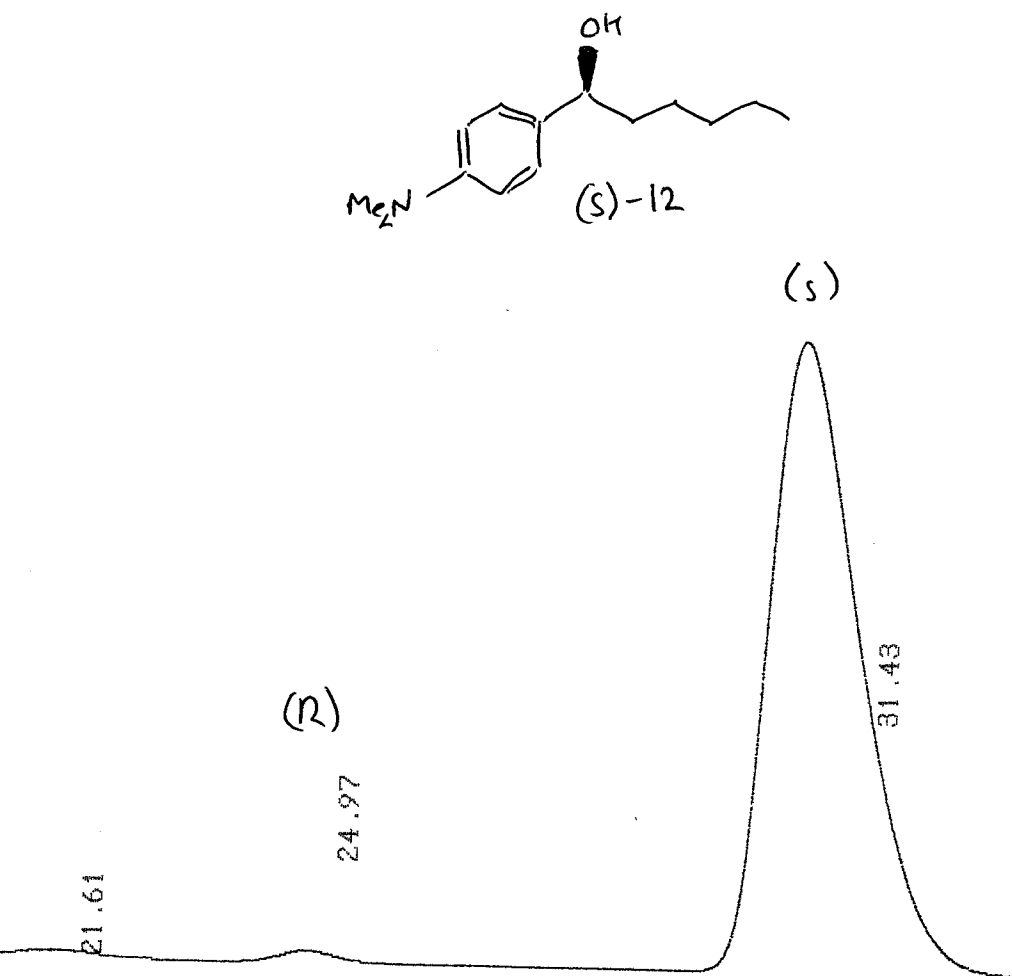

| FILE 1. | METHOD 0. | RUN 144           | INDEX 4    | CH= "A" | PS= 1. | BIN 122 |
|---------|-----------|-------------------|------------|---------|--------|---------|
| RUN2308 |           |                   |            |         |        |         |
| PEAK#   | AREA%     | RT                | AREA BC    |         |        |         |
| 1       | 0.055     | 6.14              | 86582 01   |         |        |         |
| 2       | 0.127     | 11.46             | 197653 01  |         |        |         |
| 3       | 0.21      | 18.98             | 328490 02  |         |        |         |
| 4       | 0.95      | 21.61             | 1484779 03 |         |        |         |
| 5       | 1.16      | 24.97             | 1812062 01 |         |        |         |
| 6       | 97.498    | 31.43152334248 01 |            |         |        |         |
| TOTAL   | 100.      |                   | 156243814  |         |        |         |

97.65%

Chiralcol OB-H column  
 5% iPrOH / 95% hexane  
 1ml/min flow.
